# Supplementary material for: In situ hypoxia modulating nano-catalase for amplifying DNA damage in radiation resistive colon tumors
Source: Royal Society of Chemistry journal article supplement (doi:10.1039/d3bm00618b), 2023-01-01
Supplement: d3bm00618b1.pdf [file d3bm00618b1.pdf]

Supplementary data

Figure S1 . <sup>1</sup>H NMR spectrum of MS

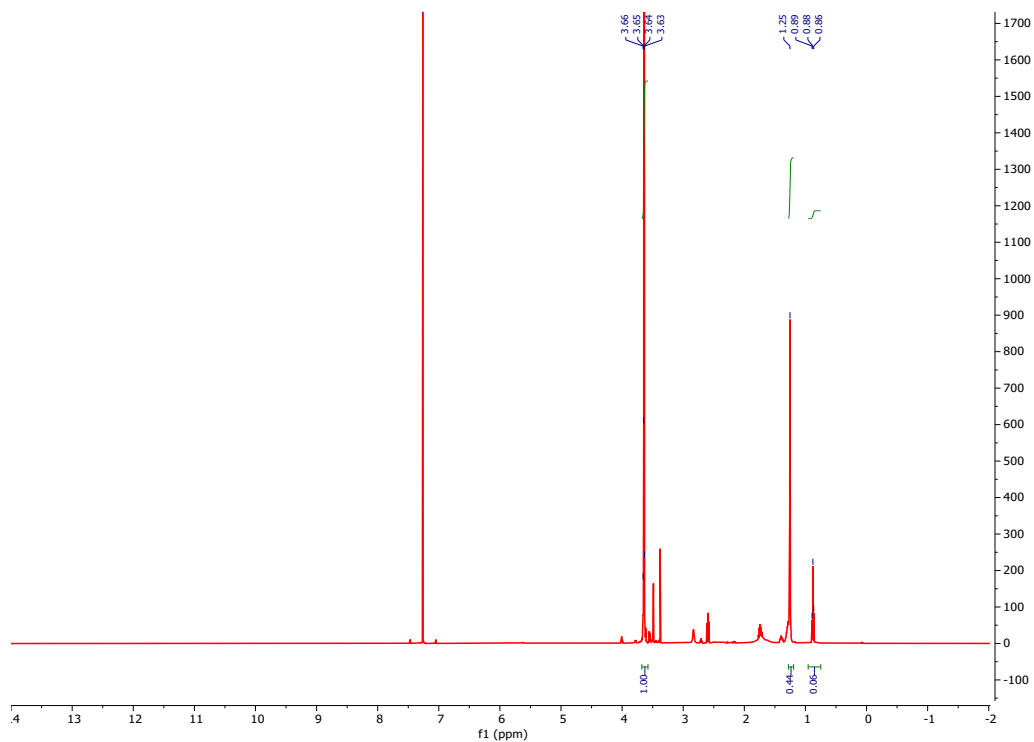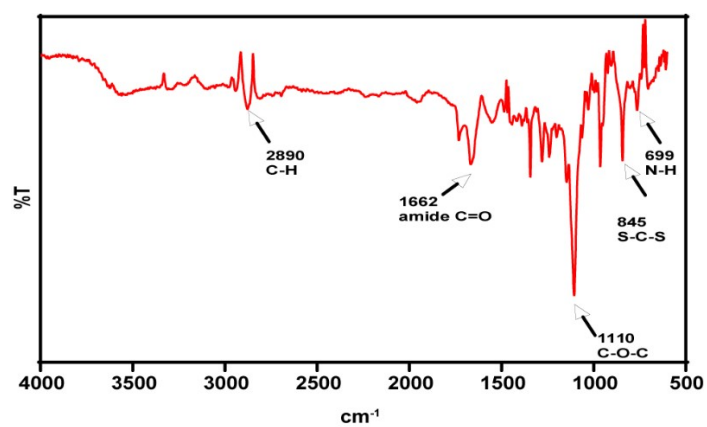

Figure S2. FT-IR Spectrum of MTS

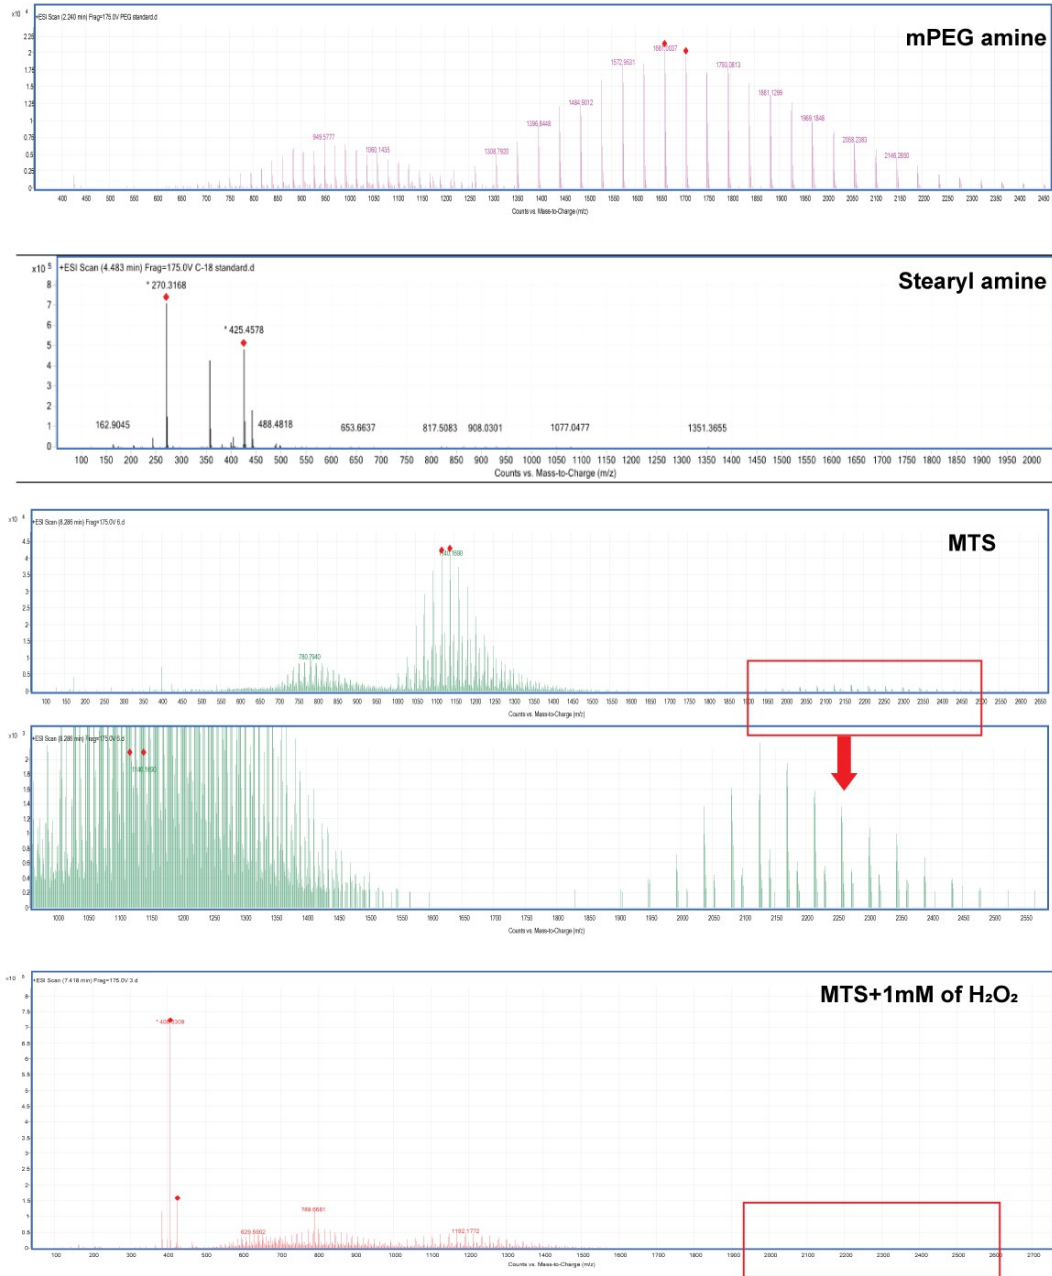

Figure S3 Mass spectrum analysis of MTS and ROS mediated degradation.

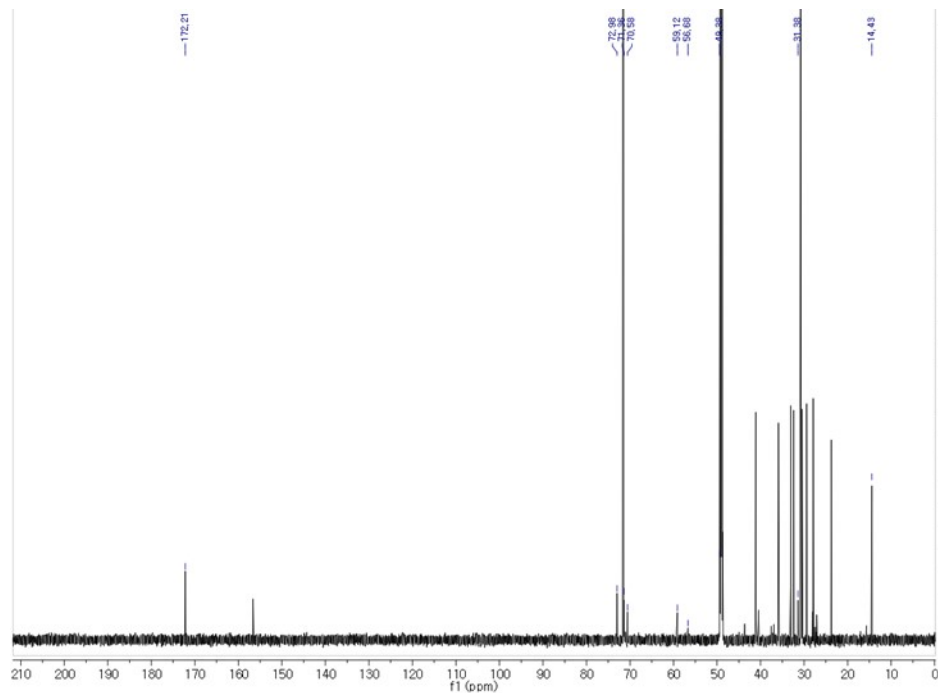

Figure S4. <sup>13</sup>C-NMR spectrum of MTS at 225 MHz in CD<sub>3</sub>OD-d<sub>4</sub>

Figure S5 . FE-TEM image of MTS.

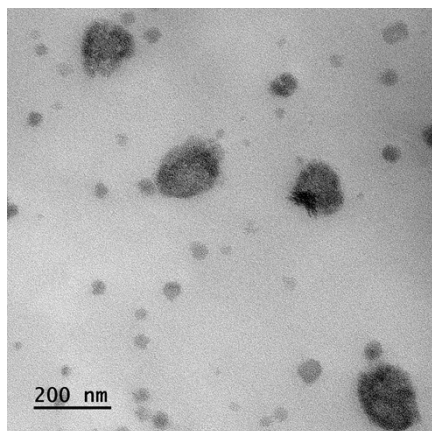

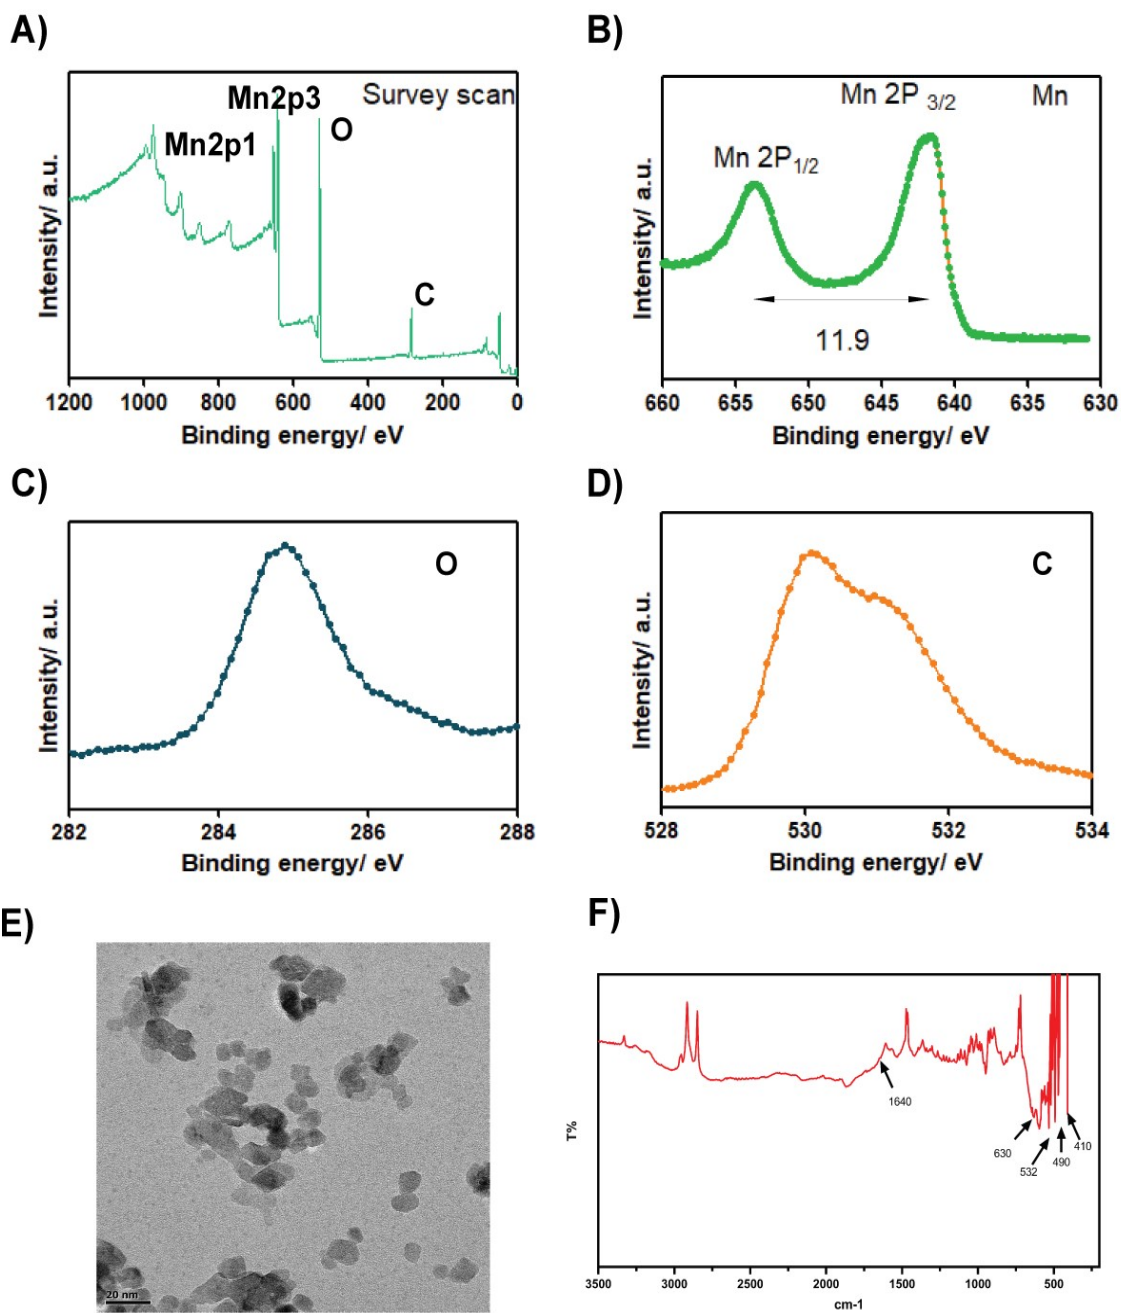

Figure S6. HMO material characterization. A) XPS survey scan spectrum of HMO . B) Mn .C) oxygen. D) Carbon. E) FE-TEM image and F) FT-IR spectrum.

Figure S7. Fluorescence intensity spectra of Ru(dpp) assay over time

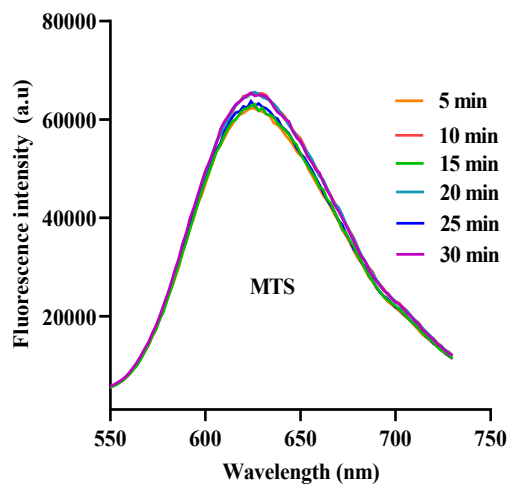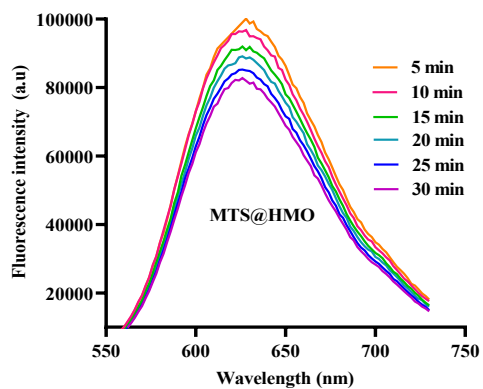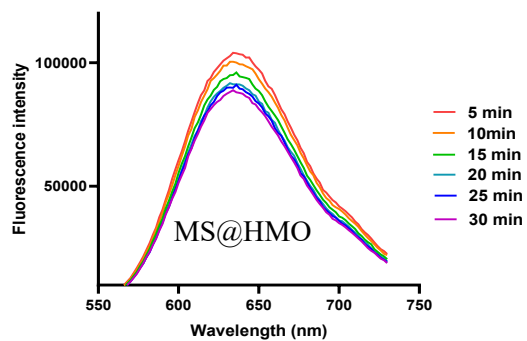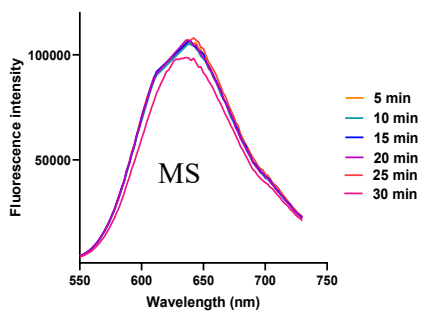

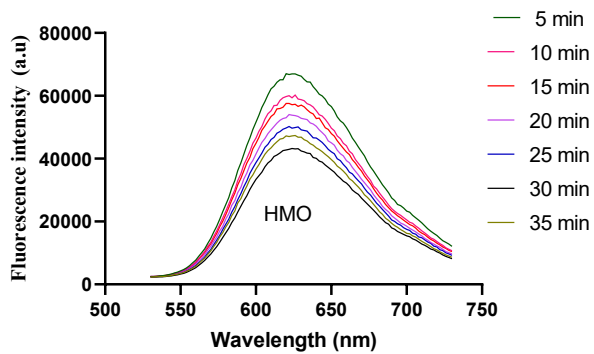

Figure S8. Cell viability of MS and MS@HMO at various concentrations under hypoxic and normoxic conditions;

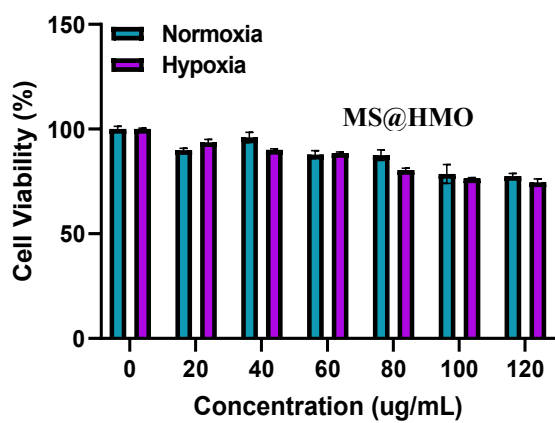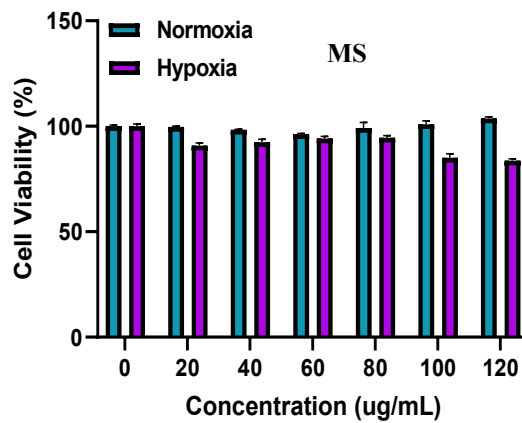

Figure S9.  $\gamma$ -H2AX in normoxic condition and its quantification

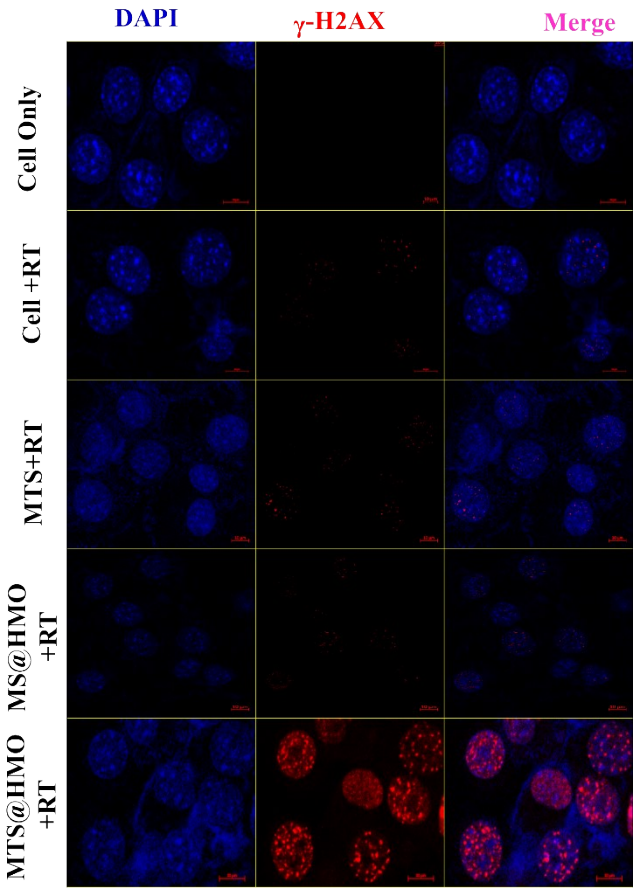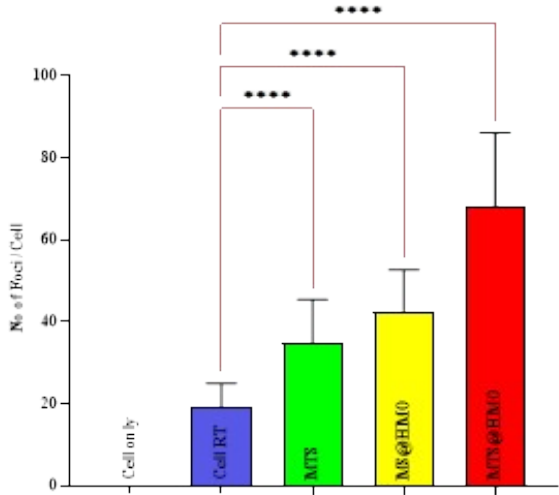

Figure S10. Plasma Mn concentration (n=3)

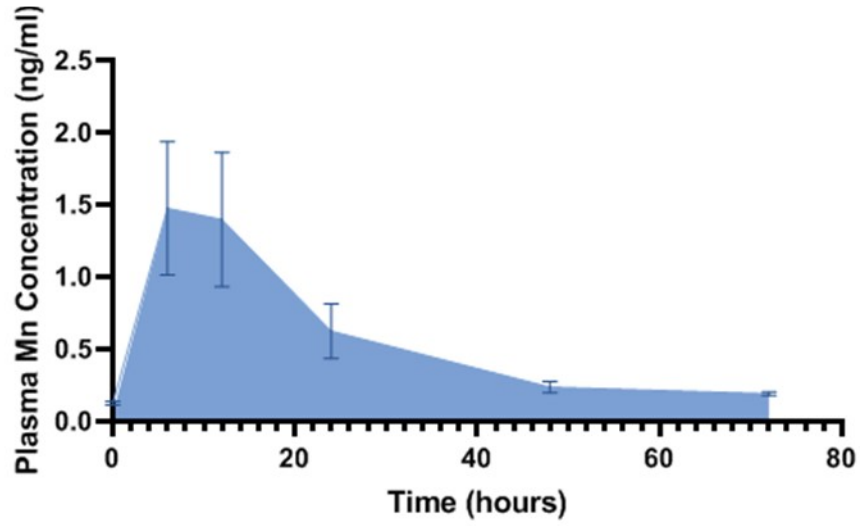

Figure S11. H&E staining in various major organs (heart, liver, spleen, lung, and kidney).

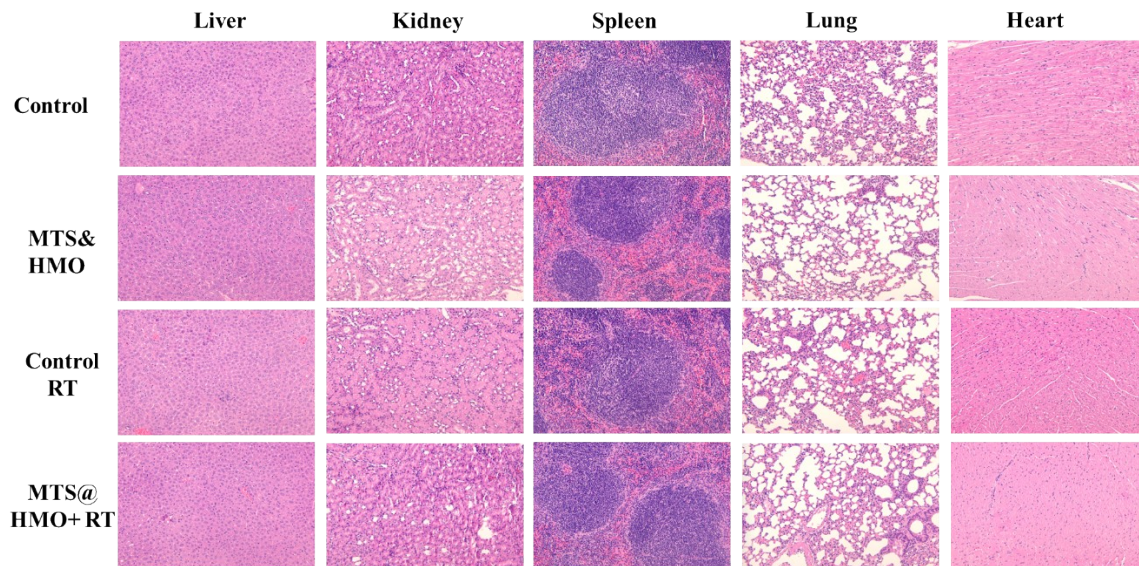



Table S1. Pharmacokinetic profiles

|                   |                      | 1       | 2       | 3       | AVG     | STD    |
|-------------------|----------------------|---------|---------|---------|---------|--------|
| Lambda_z          | 1/h                  | 0.04    | 0.03    | 0.03    | 0.03    | 0.01   |
| t1/2              | h                    | 16.11   | 24.40   | 21.99   | 20.83   | 3.48   |
| Tmax              | h                    | 6.00    | 6.00    | 6.00    | 6.00    | 0.00   |
| Cmax              | ng/ml                | 1.99    | 1.31    | 1.11    | 1.47    | 0.38   |
| C0                | ng/ml                | 0.11    | 0.13    | 0.24    | 0.16    | 0.06   |
| Clast_obs/Cmax    |                      | 0.07    | 0.19    | 0.15    | 0.14    | 0.05   |
| AUC 0-t           | ng/ml*h              | 52.47   | 35.58   | 41.94   | 43.33   | 6.97   |
| AUC 0-inf_obs     | ng/ml*h              | 55.71   | 44.51   | 47.33   | 49.18   | 4.76   |
| AUC 0-t/0-inf_obs |                      | 0.94    | 0.80    | 0.89    | 0.88    | 0.06   |
| AUMC 0-inf_obs    | ng/ml*h <sup>2</sup> | 1378.37 | 1795.67 | 1614.56 | 1596.20 | 170.86 |
| MRT 0-inf_obs     | h                    | 24.74   | 40.35   | 34.12   | 33.07   | 6.41   |
| Vz_obs            | (µg)/(ng/ml)         | 2086.02 | 3954.57 | 3351.31 | 3130.63 | 778.63 |
| Cl_obs            | (µg)/(ng/ml)/h       | 89.74   | 112.34  | 105.65  | 102.58  | 9.48   |
| Vss_obs           | (µg)/(ng/ml)         | 2220.25 | 4532.41 | 3604.28 | 3452.31 | 950.03 |

Table S2. Level of AST, ALT, BUN and Creatinine in blood

| Parameters         | Normal range | Experimental group |              |             |               |
|--------------------|--------------|--------------------|--------------|-------------|---------------|
|                    |              | Control            | PTCM         | Control RT  | PTCM RT       |
| AST (U/L)          | 59-247       | 61 ± 2.65          | 66.33 ± 15.5 | 59 ± 12.17  | 62.33 ± 39.83 |
| ALT (U/L)          | 28-132       | 17.33 ± 5.69       | 26 ± 7       | 24 ± 4.58   | 29 ± 7        |
| BUN (mg/dl)        | 18-29        | 14.73 ± 2.02       | 19.6 ± 4.14  | 22.57 ± 2.4 | 22.57 ± 4.76  |
| Creatinine (mg/dl) | 0.2-0.8      | 0.32 ± 0.04        | 0.35 ± 0.07  | 0.44 ± 0.06 | 0.46 ± 0.03   |
